# Supplementary material
Source: PubMed Central journal article supplement (PMC3067118)
Supplement: supp_55_3_1130__1.pdf [file supp_55_3_1130__1.pdf]

## Supporting Information

In vitro activity of the arylomycin natural product antibiotics against *Staphylococcus epidermidis* and other coagulase-negative staphylococci

*Peter A. Smith, Michael E. Powers, Tucker C. Roberts, and Floyd E. Romesberg\**  
*Department of Chemistry, The Scripps Research Institute, La Jolla, CA 92037, USA*

|                                                                                                    |      |
|----------------------------------------------------------------------------------------------------|------|
| Contents .....                                                                                     | Page |
| Table S1, Primers used in this study.....                                                          | 2    |
| Table S2, Accession numbers of DNA sequences used in the phylogenetic analysis of CNS species..... | 3    |
| Table S3, Inventory of active SPase proteins within Staphylococci species.....                     | 4    |
| Figure S1, Phylogenetic analysis of <i>dnaJ</i> genes .....                                        | 5    |
| Figure S2, Diagram of the <i>S. epidermidis</i> genomic region that encodes SpsIB .....            | 6    |
| Figure S3, Distribution of arylomycin sensitivities for the examined CNS species.....              | 7    |
| Figure S4, Alignment of SPase proteins from representative CNS isolates .....                      | 8    |

Table S1. Primers used in this study

| Primer Name     | Sequence                                            |
|-----------------|-----------------------------------------------------|
| CNS_551_F       | gctcgacg TTAHTRTGYTTYCCRTTTACRCC                    |
| CNS_rexB_R3_T72 | ttgtaatacgcactcactataggg GATTNCCNGTMCCWGCTC         |
| CNS_dnaJ_F      | cgtcgcgt TGGCCAAAAGAGAYTATTATGA                     |
| CNS_dnaJ_R_T72  | ttgtaatacgcactcactataggg CGGAATTGTTTACCHGTTTGWGTACC |

Primers for amplification of *dnaJ* are based on modification of those used previously (manuscript Ref. 27). Nucleotide degeneracies are indicated by the IUPAC labels. 5' extensions were added to increase annealing temperature or for sequencing and are presented in lower case lettering.

Table S2. Accession numbers of DNA sequences used in the phylogenetic analysis of CNS species

| Species                 | <i>dnaJ</i> | <i>groEL</i> | <i>rpoB</i> | 16S rDNA |
|-------------------------|-------------|--------------|-------------|----------|
| <i>S. capitis</i>       | AB234060    | AF036322     | AF325885    | FJ357585 |
| <i>S. caprae</i>        | AB234062    | AF053574     | AF325868    | AB009935 |
| <i>S. cohnii</i>        | AB234066    | AF053582     | AF325893    | D83361   |
| <i>S. epidermidis</i>   | AB234069    | AF029245     | AF325872    | CP000029 |
| <i>S. haemolyticus</i>  | AB234074    | U92809       | AF325888    | D83367   |
| <i>S. hominis</i>       | AB234075    | AF053572     | AF325875    | AY167805 |
| <i>S. lugdunensis</i>   | AB234081    | AF053570     | AF325870    | AB009941 |
| <i>S. saprophyticus</i> | AB234089    | AF053578     | AF325873    | AP008934 |
| <i>S. simulans</i>      | AB234325    | AF053584     | AF325877    | D83373   |
| <i>S. warneri</i>       | AB234328    | AF053569     | AF325887    | L37603   |
| <i>S. xylosus</i>       | AB234329    | AF053573     | AF325883    | D83374   |
| <i>M. caseolyticus</i>  | 222150250   | AF053577     | 222152109   | D83359   |

Table S3. Inventory of active SPase proteins within Staphylococci species. The amino acid regions corresponding to that between Ser<sup>29</sup> and catalytic Ser<sup>36</sup> in *S. epidermidis* is shown.

| Species                 | Protein | GI#       | Sequence       |
|-------------------------|---------|-----------|----------------|
| <i>S. epidermidis</i>   | SpsIB   | 57866486  | YSYIKGDS       |
| <i>S. lugdunensis</i>   | SpsIB   | 289551204 | SYTIKGDS       |
| <i>S. hominis</i>       | SpsIB   | 228474322 | SYTIKGDS       |
| <i>S. haemolyticus</i>  | SpsIB   | 70726986  | SYTIKGDS       |
| <i>S. simulans</i>      | SpsIB   |           | SYTVRGDS       |
| <i>S. caprae</i>        | SpsIB   |           | PYTIKGDS       |
| <i>S. cohnii</i>        | SpsIB   |           | SYTVKGDS       |
| <i>S. capitis</i>       | SpsIB   | 223042998 | PYTIKGDS       |
| <i>S. warneri</i>       | SpsIB   | 239636508 | PYTIKGDS       |
| <i>S. saprophyticus</i> | SpsIB   | 73663119  | PYTVKGDS       |
| <i>S. xylosus</i>       | SpsIB   | 94958269  | SYTVKGDS       |
| <i>S. aureus</i>        | SpsIB   | 88194660  | PYTIKGES       |
| <i>S. carnosus</i>      | SpsIB   | 224476066 | SYTVRGDS       |
| <i>S. epidermidis</i>   | SpsI    | 57865986  | SYTVKGAS       |
| <i>S. lugdunensis</i>   | SpsI    | 289551814 | TYSVSGDS       |
| <i>S. hominis</i>       | SpsI    | 228474183 | SYTVSGSS       |
| <i>S. haemolyticus</i>  | SpsI    | 70727661  | SYTVSGSS       |
| <i>S. simulans</i>      | SpsI    |           | - <sup>b</sup> |
| <i>S. caprae</i>        | SpsI    |           | - <sup>b</sup> |
| <i>S. cohnii</i>        | SpsI    |           | - <sup>b</sup> |
| <i>S. capitis</i>       | SpsI    | 223043379 | SYTVSGES       |
| <i>S. warneri</i>       | SpsI    | 239637342 | SYTVSGES       |
| <i>S. saprophyticus</i> | SpsI    |           | - <sup>c</sup> |
| <i>S. xylosus</i>       | SpsI    |           | - <sup>c</sup> |
| <i>S. aureus</i>        | SpsI    |           | - <sup>c</sup> |
| <i>S. carnosus</i>      | SpsI    |           | - <sup>c</sup> |

<sup>a</sup>Sequence determined in this study. <sup>b</sup>Unknown if protein is encoded by this species. <sup>c</sup>Protein not encoded by this species

**Figure S1.** Phylogenetic analysis of *dnaJ* genes used to confirm or reassign the speciation of select CNS isolates. The tree is rooted using *Macrococcus caseolyticus* as an outgroup. \*Database sequences used as references to determine speciation.

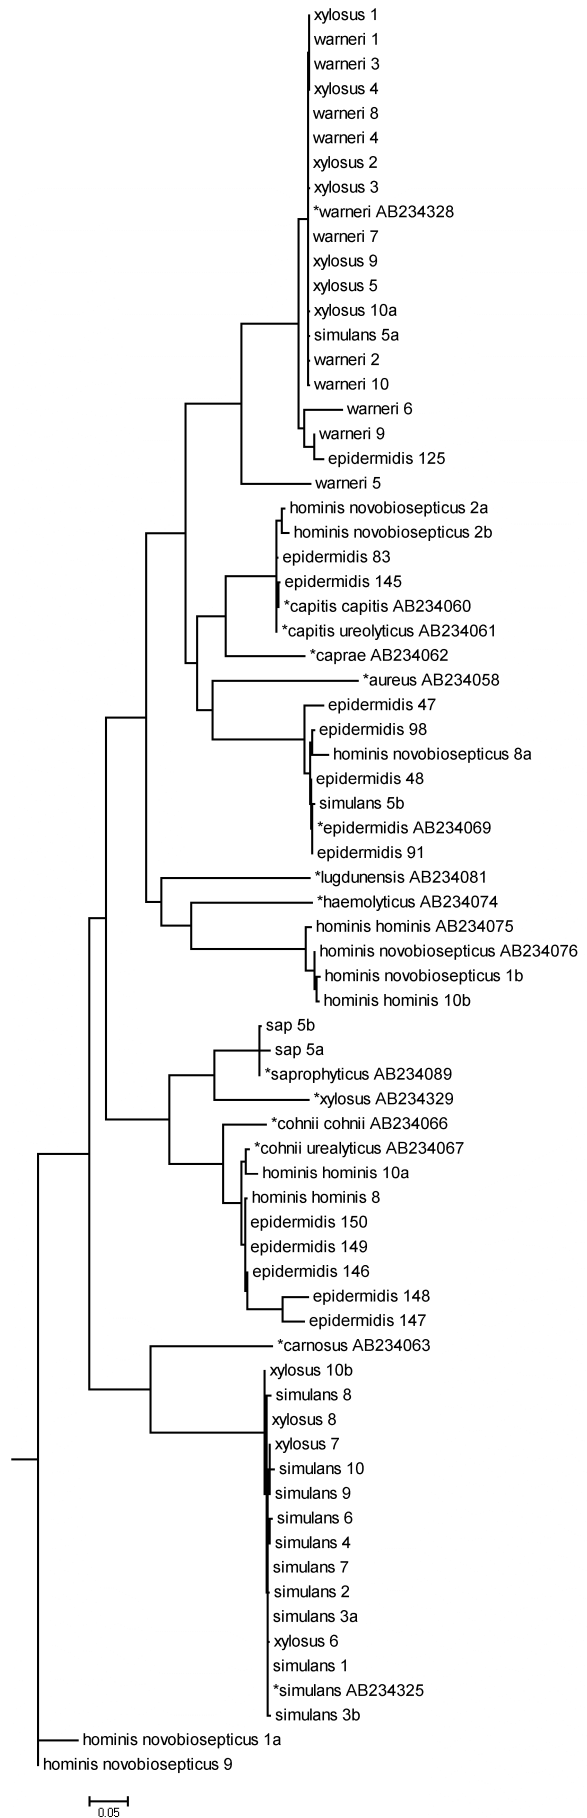

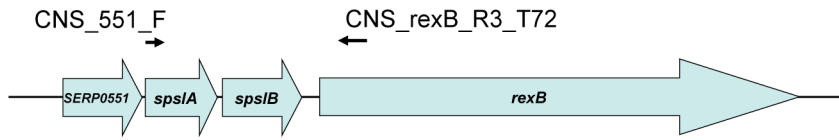

**Figure S2.** Diagram of the *S. epidermidis* genomic region that encodes SpsIB. The syntany of these genes is conserved in all of the examined CNS species. Location of the primers used to PCR amplify the *spsIB* gene are indicated. The CNS\_rexB\_R3\_T72 primer contains a tag allowing sequencing of the *spsIB* with T7 universal 2 primer.

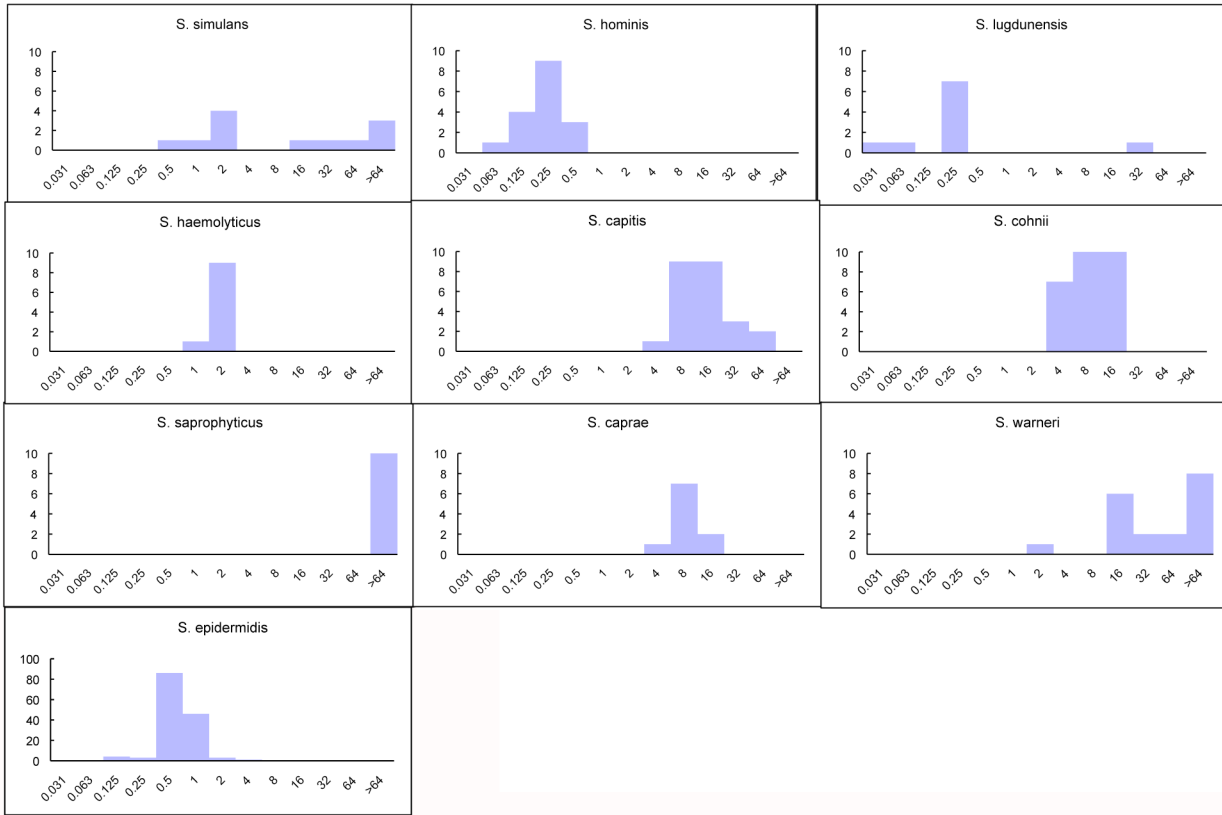

**Figure S3.** Distribution of arylomycin sensitivities for the examined CNS species shown as the number of isolates (y-axes) observed at each MIC in  $\mu\text{g/ml}$  (x-axes).

```

                20          40          60          80
S. lugdunensis spslB_289551204 VKKELTEWLI A I A V G I I L V I L I I N F V A K S Y T I K G D S M N P T L K D G D H V L V N I I G Y K V G T V K K G N V I V F H A N K D D Y V K R V I 80
S. lugdunensis MIC 32 .....
S. lugdunensis MIC 0.03 .....

                100       120       140       160
S. lugdunensis spslB_289551204 G T P G D K V Y Y R D D Q L I I N G K K V K E P Y L E Y N M K R K Q G E Y I T G S L D I K D L A G A K H N S N V I P Q H K Y L V L G D N R E V S K D S R A F G L 160
S. lugdunensis MIC 32 .....
S. lugdunensis MIC 0.03 .....

                180
S. lugdunensis spslB_289551204 I D E K Q I V G K V S L R F W P L T D F K F N F N P D M S * 190
S. lugdunensis MIC 32 .....
S. lugdunensis MIC 0.03 .....

                20          40          60          80
S. warneri spslB_239636508 L K K E I M E W I A I V V A L A L V F L I G K F V G Q P Y T I K G D S M D P T L K D G E R V V V N I M G Y K I G D V K K G N V I V F H A N K D D Y V K R V I 80
S. warneri MIC >64 V . . S . . . . . A . . . F . . V . . L . . . . .
S. warneri MIC 16 ..... A . . . . .
S. warneri MIC 2 ..... A . . . . . S . . . . .

                100       120       140       160
S. warneri spslB_239636508 G V P G D K V Q Y K K D Q L Y I N G K K Q D E P Y L N Y N E K R K Q V E Y I T G T F Q V K D L A N A N S K S N V I P K D K Y L V L G D N R E V S K D S R S F G L 160
S. warneri MIC >64 ..... I ..... P ..... G .....
S. warneri MIC 16 ..... I ..... P ..... G .....
S. warneri MIC 2 ..... I ..... P ..... G .....

                180
S. warneri spslB_239636508 I D K D Q I V G K V S F R F W P L N E F K F N F N P D N T K N * 192
S. warneri MIC >64 .....
S. warneri MIC 16 .....
S. warneri MIC 2 .....

                20          40          60          80
S. simulans MIC >64 VKKELKEWI I A I A I A L G L I L L I Y N F V A K S Y T V R G D S M F P T L K D G E K V I V N V I G F K M G G L D K G N V I V F H A D K N S D Y V K R V I 80
S. simulans MIC 64 ..... V .....
S. simulans MIC 2 .....

                100       120       140       160
S. simulans MIC >64 G T P G D S V E Y K H D V L Y V N G K K V K E P Y L D Y N E K H K S Y D E I T G T L Q V K N L P N S D G T N K I P K G K L L V L G D N R E V S K D S R S F G L I 160
S. simulans MIC 64 .....
S. simulans MIC 2 .....

                180
S. simulans MIC >64 K E D Q V V G K V S L R Y W P L T K F K V N F N P A E N * 189
S. simulans MIC 64 .....
S. simulans MIC 2 .....

```

**Figure S4.** Alignment of SPase proteins from representative CNS isolates displaying unusual sensitivities. Reference SPase sequences are included where available and are identified by their GI number. Identical amino acids are indicated by dots. MICs of the isolates whose SPase sequence are shown are listed in the sequence label.
